# Supplementary material for: Safety and Efficacy of GFB-887, a TRPC5 Channel Inhibitor, in Patients With Focal Segmental Glomerulosclerosis, Treatment-Resistant Minimal Change Disease, or Diabetic Nephropathy: TRACTION-2 Trial Design
Source: PubMed Central journal article supplement — Kidney Int Rep. 2021 Jul 23;6(10):2575–84. doi: 10.1016/j.ekir.2021.07.006 (PMC8484122; doi:10.1016/j.ekir.2021.07.006), 2021-07-23
Supplement: mmc1.pdf [file mmc1.pdf]

## **TRACTION-2 Study Sites (United States) as of April 7, 2021**

University of Alabama at Birmingham, AL  
Aventiv Research, Mesa, AZ  
Academic Medical Research Institute (AMRI), Los Angeles, CA  
Cedars-Sinai Medical Center (CSMC) - Kidney and Pancreas Transplant Center, Los Angeles, CA  
Valley Renal Medical Group, Northridge, CA  
North American Research Institute, San Dimas, CA  
Dr. Malvin Yan Inc., South Gate, CA  
DaVita Vista Del Sol, Victorville, CA  
Western Nephrology, Arvada, CO  
University of Colorado Anschutz Medical Campus, Aurora, CO  
Colorado Kidney Care (Denver Nephrology), Denver, CO  
DaVita Hartford North, Bloomfield, CT  
Kidney & Hypertension Specialists of Miami, Miami, FL  
Nephrology Associates of South Miami, PA, Miami, FL  
Avanza Medical Research Center, Pensacola, FL  
Florida Premier Research Institute, Winter Park, FL  
Masters of Clinical Research, Inc., Augusta, GA  
Boise Kidney and Hypertension Institute, Nampa, ID  
Research by Design, LLC, Chicago, IL  
Southern Illinois University School of Medicine, Springfield, IL  
Louisiana State University Health Sciences Center - School of Medicine, New Orleans, LA  
Tufts Medical Center, Boston, MA  
Renal and Transplant Associates of New England, PC, Springfield, MA  
University of Maryland Medical Center, Baltimore, MD  
University of Michigan, Ann Arbor, MI  
Wayne State University School of Medicine, Detroit, MI  
St. Clair Nephrology, Roseville, MI  
DaVita Clinical Research, Edina, MN  
University of Minnesota - Center for Pediatric Obesity Medicine, Minneapolis, MN  
Mayo Clinic, Rochester, MN  
Clinical Research Consultants (CRC), Kansas City, MO  
Eastern Nephrology Associates PLLC, New Bern, NC  
High Desert Nephrology, Gallup, NM  
DaVita Pelican Point Dialysis, Las Vegas, NV  
Mount Sinai Medical Center, New York, NY  
Akron Nephrology Associates, Inc., Akron, OH  
Cleveland Clinic, Cleveland, OH  
The Ohio State University Wexner Medical Center, Columbus, OH  
Rhode Island Hospital, East Providence, RI  
Southeast Renal Research Institute, Chattanooga, TN  
Vanderbilt University Medical Center, Nashville, TN  
Texas Tech University Health Sciences Center, Amarillo, TX  
Arlington Nephrology, PA, Arlington, TX  
El Paso Medical Research Institute (MedResearch, Inc.), El Paso, TX

Prolato Clinical Research Center, Houston, TX  
North Texas Kidney Disease Association, Lewisville, TX  
Clinical Advancement Center, PLLC, San Antonio, TX  
San Antonio Kidney Disease Center Physicians Group, PLLC, San Antonio, TX  
South Texas Renal Care Group, San Antonio, TX  
Utah Kidney Research Institute, Salt Lake City, UT  
Tidewater Kidney Specialists, Norfolk, VA  
Providence Medical Research Center, Spokane, WA
